# Supplementary material for: Mosquito Vectors (Diptera: Culicidae) and Mosquito-Borne Diseases in North Africa
Source: MDPI journal article supplement (doi:10.3390/insects13100962), 2022-10-20
Supplement: s1 [file s1]

## Supplementary file

**Table S1.** Complete list of mosquito species reported in North Africa [18,21].

| Mosquito species                        | Vector status |
|-----------------------------------------|---------------|
| <i>Aedes aegypti</i>                    | +++           |
| <i>Aedes albineus</i>                   | -             |
| <i>Aedes albopictus</i>                 | +++           |
| <i>Aedes berlandi</i>                   | -             |
| <i>Aedes biskraensis</i>                | -             |
| <i>Aedes caspius</i>                    | +             |
| <i>Aedes cinereus</i>                   | -             |
| <i>Aedes coluzzii</i>                   | -             |
| <i>Aedes detritus</i>                   | +             |
| <i>Aedes dorsalis</i>                   | -             |
| <i>Aedes dzeta</i>                      | -             |
| <i>Aedes echinus</i>                    | -             |
| <i>Aedes flavescens</i>                 | -             |
| <i>Aedes geniculatus</i>                | -             |
| <i>Aedes mariaae</i>                    | -             |
| <i>Aedes pulcritarsis</i>               | -             |
| <i>Aedes pullatus</i>                   | -             |
| <i>Aedes punctator</i>                  | -             |
| <i>Aedes quasirusticus</i>              | -             |
| <i>Aedes rusticus</i>                   | -             |
| <i>Aedes vexans</i>                     | +             |
| <i>Aedes vittatus</i>                   | -             |
| <i>Aedes zammitii</i>                   | -             |
| <i>Anopheles ainshamsi</i>              | -             |
| <i>Anopheles algeriensis</i>            | +             |
| <i>Anopheles arabiensis</i>             | +++           |
| <i>Anopheles cinereus s.l.</i>          | -             |
| <i>Anopheles claviger s.s.</i>          | +             |
| <i>Anopheles coluzzii</i>               | +++           |
| <i>Anopheles coustani</i>               | +             |
| <i>Anopheles dthali</i>                 | -             |
| <i>Anopheles hyrcanus</i>               | -             |
| <i>Anopheles labranchiae</i>            | +++           |
| <i>Anopheles maculipennis s.l.</i>      | +++           |
| <i>Anopheles marteri</i>                | -             |
| <i>Anopheles multicolor</i>             | +++           |
| <i>Anopheles petragani</i>              | -             |
| <i>Anopheles pharoensis</i>             | +++           |
| <i>Anopheles plumbeus</i>               | -             |
| <i>Anopheles rhodesiensis rupicolus</i> | -             |
| <i>Anopheles rufipesbroussesi</i>       | -             |
| <i>Anopheles sacharovi</i>              | +             |
| <i>Anopheles sergentii sergentii</i>    | +++           |
| <i>Anopheles stephensi</i>              | +++           |
| <i>Anopheles superpictus</i>            | +             |
| <i>Anopheles tenebrosus</i>             | -             |
| <i>Anopheles turkhudi</i>               | -             |
| <i>Anopheles ziemanni</i>               | -             |
| <i>Coquillettidia buxtoni</i>           | -             |
| <i>Coquillettidia richiardii</i>        | -             |

|                                   |     |
|-----------------------------------|-----|
| <i>Culex adairi</i>               | -   |
| <i>Culex antennatus</i>           | +   |
| <i>Culex arbieeni</i>             | -   |
| <i>Culex brumpti</i>              | -   |
| <i>Culex duttoni</i>              | -   |
| <i>Culex deserticola</i>          | -   |
| <i>Culex hortensis</i>            | -   |
| <i>Culex impudicus</i>            | -   |
| <i>Culex laticinctus</i>          | -   |
| <i>Culex martinii</i>             | -   |
| <i>Culex mimeticus</i>            | -   |
| <i>Culex modestus</i>             | +   |
| <i>Culex perexiguus</i>           | +   |
| <i>Culex pipiens</i>              | +++ |
| <i>Culex poicilipes</i>           | -   |
| <i>Culex pusillus</i>             | +   |
| <i>Culex quinquefasciatus</i>     | +++ |
| <i>Culex simpsoni</i>             | -   |
| <i>Culex sinaiticus</i>           | -   |
| <i>Culex sitiens</i>              | -   |
| <i>Culex territans</i>            | -   |
| <i>Culex theileri</i>             | +   |
| <i>Culex torrentium</i>           | -   |
| <i>Culex tritaeniorhynchus</i>    | -   |
| <i>Culex univittatus</i>          | +   |
| <i>Culex vagans</i>               | -   |
| <i>Culiseta annulata</i>          | +   |
| <i>Culiseta fumipennis</i>        | -   |
| <i>Culiseta litorea</i>           | -   |
| <i>Culiseta longiareolata</i>     | -   |
| <i>Culiseta morsitans</i>         | -   |
| <i>Culiseta subochrea</i>         | -   |
| <i>Orthopodomyia pulcripalpis</i> | -   |
| <i>Uranotaenia balfouri</i>       | -   |
| <i>Uranotaenia unguiculata</i>    | -   |

+++ Confirmed vector, + Potential vector, - No known vector role.
